# Supplementary material
Source: PubMed Central journal article supplement (PMC3428132)
Supplement: NIHMS399841-supplement-1_si_001.pdf [file NIHMS399841-supplement-1_si_001.pdf]

## Supporting Figures:

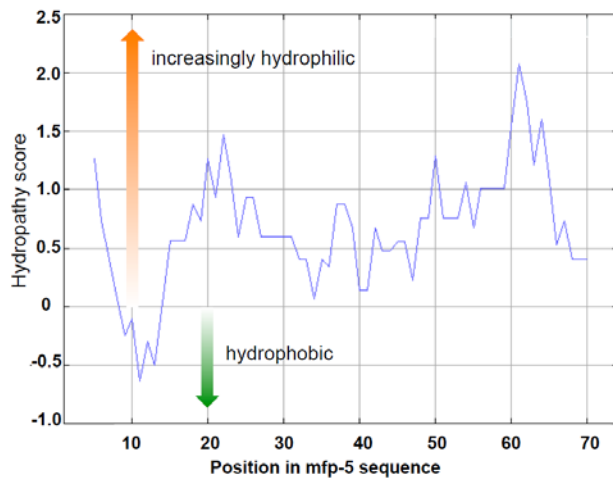

**Supplementary Figure S1** - Hopp and Woods hydropathy (ExPaSy tools) plot of Mfp-5 using hydropathy values from (Nozaki and Tanford) for standard amino acids and Dopa. Phosphoserine hydropathy was assumed to resemble values for aspartate.

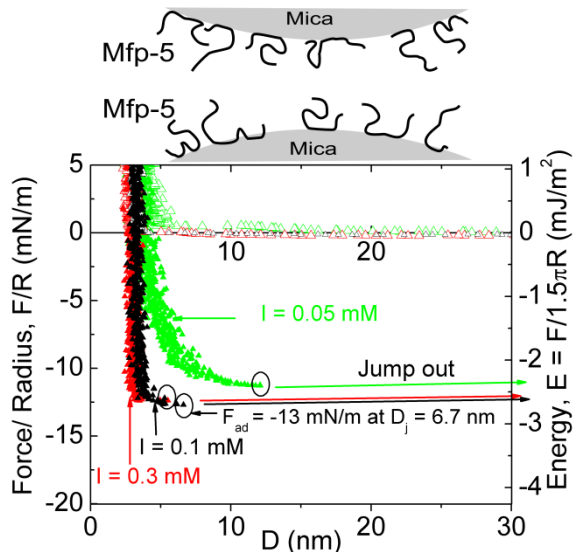

**Supplementary Figure S2**- Effect of salt concentration on the Mfp-5/Mfp-5 self-interaction (i.e. cohesion) after a 14 min (840 s) wait time. Deposition of Mfp-5 of symmetric mica sheets at pH 2.6 and I=100mM. Circled portions indicate peak adhesive strengths  $F_{ad}$  of the run.

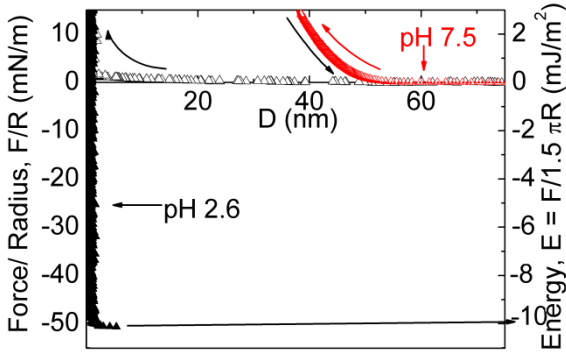

**Supplementary Figure S3-** Mefp-5 adhesion to mica showing adhesion abolition upon raising the pH to 7.5.  $I=100\text{mM}$  and  $I=584$  for pH 2.6 and pH 7.5, respectively.

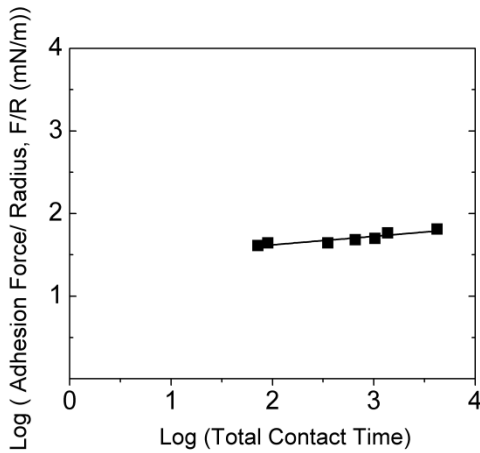

**Supplementary Figure S4-** Mefp-5 adhesion to mica as plotted on a Log/Log plot with the total contact time against the adhesive force. Linear regression slope= 0.103,  $R^2=0.82$ .

### Supplementary data - Calculation of the refractive index and volume fraction of compressed protein:

Calculation of the volume fraction of protein in the compressed layer between two mica surfaces in SFA is possible if the refractive index  $\mu$  can be determined:

$$\mu = \mu_{\text{mica}} \sqrt{\frac{(n-1)F_{n-1}}{nF_n} * \frac{\lambda_{n-1}^D - \lambda_{n-1}^0}{\lambda_n^D - \lambda_n^0}} \quad (\text{for odd } n) \quad (\text{equation A4 from reference 18})$$

where  $\mu_{\text{mica}}$  is the refractive index,  $\lambda$  is the wavelength,  $n$  is fringe order and  $F_n$  is a correction factor approximated by  $F_n = 1.024 + 1/n$ . Calculations of 16 runs from three different set-ups gave a refractive index of  $1.538 \pm 0.012$ . Using the knowledge that refractive index of water ( $\mu_w$ ) and pure protein ( $\mu_p$ ) have assumed values of 1.333 and 1.55 respectively, the simple formula

$$\text{volume fraction} = \frac{\mu - \mu_w}{\mu_p - \mu_w}$$

This gives the 95% Mefp-5  $\pm$  5% by volume in the compressed layer.

### Supplementary data - Calculations for protein deposition and H-bond strength:

We can use the average  $\frac{1}{4} \text{ cm}^2$  piece of mica with a protein deposition 5 nm thick (a common measure for a hard wall). The 5nm of protein is estimated to be 95% ( $\pm 5\%$ ) protein by volume from the measured refractive index of compressed layers. This approximates the volume of protein to be  $2.96 * 10^{-8} \text{ cm}^3$ . A small protein such as Mefp-5 can be estimated to have a density of  $1.45 \text{ g/cm}^3$  (Quillin et al.). This gives a film of  $4.29 * 10^{-8} \text{ g}$  of protein. A deposition of 20  $\mu\text{l}$  of 20  $\mu\text{g/ml}$  has  $4 * 10^{-7} \text{ g}$  of protein which gives a final deposition onto mica of  $\sim 11\%$  the possible protein from bulk under these specified conditions.

In the adhesion measurements where the hard wall was 1 nm we can reasonably assume that we have 1/5 of the protein present at 5 nm. This gives us a deposition of  $8.58 * 10^{-9} \frac{\text{g}}{\frac{1}{4} \text{ cm}^2 \text{ mica}}$  and with a  $M_w$  of 9.5 kDa and assuming of the 20 mol of Dopa in Mefp-5, half (10) go to each of the two mica sheets, we average  $3.61 * 10^{-7} \frac{\text{mol Dopa}}{\text{m}^2}$ . If we take our strongest adhesion value of  $0.0137 \frac{\text{J}}{\text{m}^2}$  we find that Dopa can be assigned  $40.67 \frac{\text{kJ}}{\text{mol}}$ . As each Dopa has 2 H-bonds to the mica substrate, a value of  $20.34 \frac{\text{kJ}}{\text{mol}}$  seems quite reasonable and backs our assumptions as reasonable.

### Supplemental Bibliography

Nozaki, Y., and Tanford, C. (1971) The solubility of amino acids and two glycine peptides in aqueous ethanol and dioxane solutions, *J. Bio. Chem.* 246, 2211–2217.

Quillin, M.L., and Matthews, B.W. (2000). Accurate calculation of the density of proteins. *Acta Crystallog. D Crystallography D* 56, 791-794.
